# Supplementary material
Source: PubMed Central journal article supplement (PMC7212058)
Supplement: EMS86316-supplement-Supplementary_table_1.pdf [file EMS86316-supplement-Supplementary_table_1.pdf]

Supplementary table 1: Assay informations

| Assay           | Assay Technology | Antibody code     | Epitope                                       | Sensitivity (pM) | Specificity                                                                             | Linear Range (pM) |
|-----------------|------------------|-------------------|-----------------------------------------------|------------------|-----------------------------------------------------------------------------------------|-------------------|
| Cholecystokinin | RIA              | 92128-5           | C-terminal heptapeptide of bioactive CCKs     | 0.1              | Detects all bioactive, O-sulfated CCKs (-58, -33, -22, -8) but no gastrin peptide       | 0.1-50            |
| Chromogranin A  | RIA              | 95058-5           | Sequence 1-439 and 340-348                    | 2                | Detects all CgA fragments containing the epitope                                        | 2-200             |
| Gastrin         | RIA              | 2604-8            | C-terminal heptapeptide of bioactive gastrins | 0.5              | Detects all bioactive gastrins (-71, -34, -17 and -14) but no CCK peptide.              | 0.5-100           |
| GIP intact      | RIA              | 98171             | N-terminal                                    | 1                | Reacts with the N-terminal part and not with truncated forms of GIP or related peptides | 1-160             |
| GIP total       | RIA              | 80867-5           | C-terminal                                    | 1                | React fully with intact GIP and truncated forms of GIP                                  | 1-160             |
| Glucagon intact | ELISA            | 10-1271-01        | N-and C-terminal specific                     | 1                | Detect only pancreatic glucagon                                                         | 1-170             |
| Glucagon total  | RIA              | 4305              | C-terminal                                    | 1                | Detect all bioactive forms of glucagon                                                  | 1-200             |
| GLP-1 intact    | ELISA            | F5, Mab 26.11     | 7-36/37                                       | 1                | No cross-reactivity with N-terminal or C-terminal truncated forms of GLP-1              | 1-100             |
| GLP-1 total     | RIA              | 390               | x-36NH2                                       | 1                | Detect all amidated forms of GLP-1 equally                                              | 1-200             |
| GLP-2 intact    | RIA              | 92160             | N-terminal part of GLP-2                      | 1                | Detect only intact GLP-2                                                                | 1-160             |
| Insulin         | RIA              | 2006-3 and 2004-3 |                                               | 1                | Detect all bioactive forms of insulin                                                   | 1-160             |

|                                   |     |        |              |   |                                                      |       |
|-----------------------------------|-----|--------|--------------|---|------------------------------------------------------|-------|
| Neurotensin total                 | RIA | 3D97   | N-terminal   | 1 | Detect all bioactive forms of neurotensin            | 1-200 |
| Oxyntomodulin/glicentin           | RIA | 645    | C-terminal   | 5 | Detect oxyntomodulin and glicentin equally           | 5-160 |
| Pancreatic Polypeptide            | RIA | 7198   | Side-viewing | 1 | Detect all bioactive forms of pancreatic polypeptide | 1-100 |
| PYY total                         | RIA | T-4093 | Side-viewing | 5 | Detect all bioactive forms of PYY                    | 1-160 |
| Somatostatin                      | RIA | 1758-5 | Side-viewing | 1 | Detects all bioactive forms of somatostatin          | 1-100 |
| Vasoactive Intestinal Polypeptide | RIA | 1977   | Side-viewing | 5 | Detects all bioactive forms of VIP                   | 1-100 |
